# Supplementary material for: Influence of a fluorine substituent on the mesomorphic properties of unsymmetrical five-ring bent-core compounds
Source: Royal Society of Chemistry journal article supplement (doi:10.1039/b406548b), 2004-01-01
Supplement: b406548b.doc [file b406548b.doc]

# "RSC's Electronic Supplementary Information ": Paper No: B406548B

† Physical, spectral and analytical data for compounds for **1-4** and **6-20** are given below.

**1-(2-Fluoro-4-*n*-hexyloxybenzoyloxy-4-benzoyloxy)phenylene-3-(4-*n*-dodecyloxy-**

**benzoyloxy-4-benzoate), 1**

Yield, 76%; m.p. 99.0C; max: 3072, 2922, 2853, 1757, 1734, 1717, 1603, 1254, 1161, 1061 cm-1; H: 8.29-8.27 (d, 4H, 3J8.4Hz, Ar-H), 8.16-8.14 (d, 2H, 3J8.88Hz, Ar-H), 8.08-8.03 (t, 1H, 3J8.64Hz, Ar-H), 7.52-7.48 (t, 1H, 3J8.4Hz, Ar-H), 7.40-7.36 (m, 4H, Ar-H), 7.21-7.17 (m, 3H, Ar-H), 7.0-6.98 (d, 2H, 3J8.88Hz, Ar-H), 6.80-6.78 (dd, 1H, 3J8.92Hz, 4J2.12Hz, Ar-H), 6.72-6.68 (dd, 1H, 3J12.72Hz, 4J2.24Hz, Ar-H), 4.07-4.02 (t  2, 4H, 3J6.68Hz, 2  Ar-O-CH2-), 1.84-1.79 (m, 4H, 2  Ar-O-CH2-CH2-), 1.48-1.27 (m, 24H, 12  -CH2-), 0.90-0.87 (m, 6H, 2  -CH3).

**1-(2-Fluoro-4-*n*-heptyloxybenzoyloxy-4-benzoyloxy)phenylene-3-(4-*n*-dodecyloxy-**

**benzoyloxy-4-benzoate), 2**

Yield, 70%; m.p. 97.0C; max: 3071, 2922, 2853, 1736, 1724, 1603, 1256, 1161, 1059 cm-1; H: 8.29-8.27 (d, 4H, 3J8.52Hz, Ar-H), 8.16-8.14 (d, 2H, 3J8.8Hz, Ar-H), 8.08-8.03 (t, 1H, 3J8.64Hz, Ar-H), 7.52-7.48 (t, 1H, 3J8.28Hz, Ar-H), 7.40-7.36 (m, 4H, Ar-H), 7.20-7.17 (m, 3H, Ar-H), 7.0-6.98 (d, 2H, 3J8.8Hz, Ar-H), 6.80-6.78 (dd, 1H, 3J8.84Hz, 4J2.2Hz, Ar-H), 6.72-6.68 (dd, 1H, 3J12.72Hz, 4J2.16Hz, Ar-H), 4.07-4.02 (t  2, 4H, 3J6.68Hz, 2  Ar-O-CH2-), 1.86-1.79 (m, 4H, 2  Ar-O-CH2-CH2-), 1.47-1.27 (m, 26H, 13  -CH2-), 0.90-0.87 (m, 6H, 2  -CH3).

**1-(2-Fluoro-4-*n*-octyloxybenzoyloxy-4-benzoyloxy)phenylene-3-(4-*n*-dodecyloxy-**

**benzoyloxy-4-benzoate), 3**

Yield, 65%; m.p. 99.0C; max: 3071, 2922, 2853, 1732, 1603, 1256, 1163, 1059 cm-1; H: 8.29-8.27 (d, 4H, 3J8.52Hz, Ar-H), 8.16-8.14 (d, 2H, 3J8.84Hz, Ar-H), 8.08-8.03 (t, 1H, 3J8.64Hz, Ar-H), 7.52-7.48 (t, 1H, 3J8.4Hz, Ar-H), 7.40-7.36 (m, 4H, Ar-H), 7.21-7.17 (m, 3H, Ar-H), 7.0-6.98 (d, 2H, 3J8.84Hz, Ar-H), 6.80-6.78 (dd, 1H, 3J8.88Hz, 4J2.28Hz, Ar-H), 6.72-6.68 (dd, 1H, 3J12.76Hz, 4J2.32Hz, Ar-H), 4.07-4.02 (t  2, 4H, 3J6.64Hz 2  Ar-O-CH2-), 1.86-1.79 (m, 4H, 2  Ar-O-CH2-CH2-), 1.47-1.27 (m, 28H, 14  -CH2-), 0.90-0.87 (m, 6H, 2  -CH3).

**1-(2-Fluoro-4-*n*-nonyloxybenzoyloxy-4-benzoyloxy)phenylene-3-(4-*n*-dodecyloxy-**

**benzoyloxy-4-benzoate), 4**

Yield, 71%; m.p. 90.0C; max: 3071, 2924, 2853, 1732, 1721, 1603, 1258, 1161, 1059 cm-1; H: 8.29-8.27 (d, 4H, 3J8.48Hz, Ar-H), 8.16-8.14 (d, 2H, 3J8.84Hz, Ar-H), 8.08-8.03 (t, 1H, 3J8.64Hz, Ar-H), 7.52-7.48 (t, 1H, 3J8.36Hz, Ar-H), 7.40-7.36 (m, 4H, Ar-H), 7.20-7.17 (m, 3H, Ar-H), 7.0-6.98 (d, 2H, 3J8.84Hz, Ar-H), 6.80-6.78 (dd, 1H, 3J8.88Hz, 4J2.16Hz, Ar-H), 6.72-6.68 (dd, 1H, 3J12.72Hz, 4J2.24Hz, Ar-H), 4.07-4.02 (t  2, 4H, 3J6.64Hz 2  Ar-O-CH2-), 1.84-1.79 (m, 4H, 2  Ar-O-CH2-CH2-), 1.47-1.27 (m, 30H, 15  -CH2-), 0.89-0.87 (m, 6H, 2  -CH3).

**1-(2-Fluoro-4-*n*-undecyloxybenzoyloxy-4-benzoyloxy)phenylene-3-(4-*n*-dodecyloxy-**

**benzoyloxy-4-benzoate), 6**

Yield, 75%; m.p. 96.0C; max: 3076, 2918, 2851, 1738, 1732, 1620, 1603, 1278, 1130, 1070 cm-1; H: 8.29-8.27 (d, 4H, 3J8.56Hz, Ar-H), 8.16-8.14 (d, 2H, 3J8.8Hz, Ar-H), 8.08-8.03 (t, 1H, 3J8.64Hz, Ar-H), 7.52-7.49 (t, 1H, 3J8.32Hz, Ar-H), 7.40-7.36 (m, 4H, Ar-H), 7.20-7.17 (m, 3H, Ar-H), 7.0-6.98 (d, 2H, 3J8.8Hz, Ar-H), 6.80-6.78 (dd, 1H, 3J8.88Hz, 4J2.04Hz, Ar-H), 6.72-6.68 (dd, 1H, 3J12.68Hz, 4J2.04Hz, Ar-H), 4.07-4.02 (t  2, 4H, 3J6.68Hz, 2  Ar-O-CH2-), 1.84-1.79 (m, 4H, 2  Ar-O-CH2-CH2-), 1.47-1.27 (m, 34H, 17  -CH2-), 0.90-0.87 (m, 6H, 2  -CH3).

**1-(2-Fluoro-4-*n*-dodecyloxybenzoyloxy-4-benzoyloxy)phenylene-3-(4-*n*-dodecyloxy-**

**benzoyloxy-4-benzoate), 7**

Yield, 68%; m.p. 98.0C; max: 3080, 2918, 2853, 1736, 1732, 1620, 1603, 1269, 1132, 1069 cm-1; H: 8.29-8.27 (d, 4H, 3J8.44Hz, Ar-H), 8.16-8.14 (d, 2H, 3J8.84Hz, Ar-H), 8.08-8.03 (t, 1H, 3J8.64Hz, Ar-H), 7.52-7.49 (t, 1H, 3J8.36Hz, Ar-H), 7.40-7.36 (m, 4H, Ar-H), 7.21-7.17 (m, 3H, Ar-H), 7.0-6.98 (d, 2H, 3J8.84Hz, Ar-H), 6.80-6.78 (dd, 1H, 3J8.84Hz, 4J2.16Hz, Ar-H), 6.71-6.68 (dd, 1H, 3J12.68Hz, 4J2.2Hz, Ar-H), 4.07-4.02 (t  2, 4H, 3J6.68Hz, 2  Ar-O-CH2-), 1.84-1.79 (m, 4H, 2  Ar-O-CH2-CH2-), 1.47-1.27 (m, 36H, 18  -CH2-), 0.90-0.87 (m, 6H, 2  -CH3).

**1-(2-Fluoro-4-*n*-tetradecyloxybenzoyloxy-4-benzoyloxy)phenylene-3-(4-*n*-dodecyl-**

**oxybenzoyloxy-4-benzoate), 8**

Yield, 70%; m.p. 80.0C; max: 3076, 2916, 2851, 1732, 1730, 1622, 1603, 1281, 1142, 1070 cm-1; H: 8.29-8.27 (d, 4H, 3J8.32Hz, Ar-H), 8.16-8.14 (d, 2H, 3J8.88Hz, Ar-H), 8.08-8.03 (t, 1H, 3J8.64Hz, Ar-H), 7.52-7.49 (t, 1H, 3J8.36Hz, Ar-H), 7.40-7.36 (m, 4H, Ar-H), 7.21-7.17 (m, 3H, Ar-H), 7.0-6.98 (d, 2H, 3J8.88Hz, Ar-H), 6.80-6.78 (dd, 1H, 3J8.92Hz, 4J2.08Hz, Ar-H), 6.71-6.68 (dd, 1H, 3J12.72Hz, 4J2.24Hz, Ar-H), 4.07-4.02 (t  2, 4H, 3J6.6Hz, 2  Ar-O-CH2-), 1.84-1.79 (m, 4H, 2  Ar-O-CH2-CH2-), 1.47-1.27 (m, 40H, 20  -CH2-), 0.90-0.87 (m, 6H, 2  -CH3).

**1-(2-Fluoro-4-*n*-hexadecyloxybenzoyloxy-4-benzoyloxy)phenylene-3-(4-*n*-dodecyl-**

**oxybenzoyloxy-4-benzoate), 9**

Yield, 64%; m.p. 70.0C; max: 3078, 2916, 2851, 1736, 1732, 1730, 1622, 1603, 1281, 1163, 1070 cm-1; H: 8.29-8.27 (d, 4H, 3J8.4Hz, Ar-H), 8.16-8.14 (d, 2H, 3J8.88Hz, Ar-H), 8.08-8.03 (t, 1H, 3J8.64Hz, Ar-H), 7.52-7.49 (t, 1H, 3J8.36Hz, Ar-H), 7.40-7.36 (m, 4H, Ar-H), 7.21-7.17 (m, 3H, Ar-H), 7.0-6.98 (d, 2H, 3J8.88Hz, Ar-H), 6.80-6.78 (dd, 1H, 3J8.8Hz, 4J2.2Hz, Ar-H), 6.71-6.68 (dd, 1H, 3J12.72Hz, 4J2.28Hz, Ar-H), 4.07-4.02 (t  2, 4H, 3J6.56Hz, 2  Ar-O-CH2-), 1.84-1.79 (m, 4H, 2  Ar-O-CH2-CH2-), 1.47-1.27 (m, 44H, 22  -CH2-), 0.90-0.86 (m, 6H, 2  -CH3).

**1-(2-Fluoro-4-*n*-octadecyloxybenzoyloxy-4-benzoyloxy)phenylene-3-(4-*n*-dodecyl-**

**oxybenzoyloxy-4-benzoate), 10**

Yield, 72%; m.p.79.0C; max: 3076, 2918, 2851, 1738, 1732, 1620, 1603, 1281, 1163, 1070 cm-1; H: 8.29-8.27 (d, 4H, 3J8.44Hz, Ar-H), 8.16-8.14 (d, 2H, 3J8.84Hz, Ar-H), 8.08-8.03 (t, 1H, 3J8.64Hz, Ar-H), 7.52-7.49 (t, 1H, 3J8.32Hz, Ar-H), 7.40-7.36 (m, 4H, Ar-H), 7.20-7.17 (m, 3H, Ar-H), 7.0-6.98 (d, 2H, 3J8.84Hz, Ar-H), 6.80-6.78 (dd, 1H, 3J8.88Hz, 4J2.08Hz, Ar-H), 6.71-6.68 (dd, 1H, 3J12.72Hz, 4J2.24Hz, Ar-H), 4.07-4.02 (t  2, 4H, 3J6.6Hz, 2  Ar-O-CH2-), 1.84-1.79 (m, 4H, 2  Ar-O-CH2-CH2-), 1.48-1.26 (m, 48H, 24  -CH2-), 0.90-0.87 (m, 6H, 2  -CH3).

**1-(3-Fluoro-4-*n*-hexyloxybenzoyloxy-4-benzoyloxy)phenylene-3-(4-*n*-dodecyl-**

**oxybenzoyloxy-4-benzoate), 11**

Yield, 76%; m.p. 103.0C; max: 3073, 2922, 2853, 1734, 1605, 1256, 1163, 1061 cm-1; H: 8.30-8.27 (m, 4H, Ar-H), 8.16-8.14 (d, 2H, 3J8.88Hz, Ar-H), 7.98-7.96 (d, 1H, 3J8.64Hz, Ar-H), 7.93-7.89 (dd, 1H, 3J11.44Hz, 4J1.96Hz, Ar-H), 7.52-7.48 (t, 1H, 3J8.32Hz, Ar-H), 7.38-7.36 (d, 4H, 3J7.88Hz, Ar-H), 7.20-7.17 (m, 3H, Ar-H), 7.07-7.02 (t, 1H, 3J8.32Hz, Ar-H), 7.00-6.98 (d, 2H, 3J8.88Hz, Ar-H), 4.15-4.12 (t, 2H, 3J6.6Hz, Ar-O-CH2-), 4.07-4.02 (t, 2H, 3J6.56Hz, Ar-O-CH2-), 1.91-1.79 (m, 4H, 2  Ar-O-CH2-CH2-), 1.54-1.27 (m, 24H, 12  -CH2-), 0.94-0.87 (m, 6H, 2  -CH3).

**1-(3-Fluoro-4-*n*-heptyloxybenzoyloxy-4-benzoyloxy)phenylene-3-(4-*n*-dodecyloxy-**

**benzoyloxy-4-benzoate), 12**

Yield, 74%; m.p. 101.5C; max: 3073, 2924, 2853, 1747, 1736, 1726, 1603, 1256, 1163, 1061 cm-1; H: 8.30-8.27 (m, 4H, Ar-H), 8.16-8.14 (d, 2H, 3J8.88Hz, Ar-H), 7.98-7.96 (d, 1H, 3J8.64Hz, Ar-H), 7.93-7.89 (dd, 1H, 3J11.44Hz, 4J2.04Hz, Ar-H), 7.52-7.48 (t, 1H, 3J8.36Hz, Ar-H), 7.38-7.36 (d, 4H, 3J7.8Hz, Ar-H), 7.20-7.17 (m, 3H, Ar-H), 7.07-7.02 (t, 1H, 3J8.28Hz, Ar-H), 7.00-6.98 (d, 2H, 3J8.88Hz, Ar-H), 4.15-4.12 (t, 2H, 3J6.6Hz, Ar-O-CH2-), 4.07-4.02 (t, 2H, 3J6.56Hz, Ar-O-CH2-), 1.91-1.79 (m, 4H, 2  Ar-O-CH2-CH2-), 1.52-1.27 (m, 26H, 13  -CH2-), 0.92-0.87 (m, 6H, 2  -CH3).

**1-(3-Fluoro-4-*n*-octyloxybenzoyloxy-4-benzoyloxy)phenylene-3-(4-*n*-dodecyloxy-**

**benzoyloxy-4-benzoate), 13**

Yield, 70%; m.p. 102.0C; max: 3072, 2922, 2853, 1746, 1738, 1726, 1603, 1256, 1163, 1061 cm-1; H: 8.30-8.27 (m, 4H, Ar-H), 8.16-8.14 (d, 2H, 3J8.76Hz, Ar-H), 7.98-7.96 (d, 1H, 3J8.64Hz, Ar-H), 7.93-7.89 (dd, 1H, 3J11.44Hz, 4J1.92Hz, Ar-H), 7.52-7.48 (t, 1H, 3J8.24Hz, Ar-H), 7.39-7.36 (d, 4H, 3J8.56Hz, Ar-H), 7.20-7.17 (m, 3H, Ar-H), 7.07-7.02 (t, 1H, 3J8.28Hz, Ar-H), 7.00-6.98 (d, 2H, 3J8.76Hz, Ar-H), 4.15-4.12 (t, 2H, 3J6.56Hz, Ar-O-CH2-), 4.07-4.02 (t, 2H, 3J6.52Hz, Ar-O-CH2-), 1.91-1.79 (m, 4H, 2  Ar-O-CH2-CH2-), 1.50-1.27 (m, 28H, 14  -CH2-), 0.90-0.87 (m, 6H, 2  -CH3).

**1-(3-Fluoro-4-*n*-nonyloxybenzoyloxy-4-benzoyloxy)phenylene-3-(4-*n*-dodecyloxy-**

**benzoyloxy-4-benzoate), 14**

Yield, 72%; m.p. 103.0C; max: 3078, 2920, 2853, 1736, 1605, 1281, 1163, 1061 cm-1; H: 8.30-8.27 (m, 4H, Ar-H), 8.16-8.14 (d, 2H, 3J8.88Hz, Ar-H), 7.98-7.96 (d, 1H, 3J8.64Hz, Ar-H), 7.93-7.89 (dd, 1H, 3J11.48Hz, 4J2.04Hz, Ar-H), 7.52-7.48 (t, 1H, 3J8.24Hz, Ar-H), 7.39-7.36 (d, 4H, 3J8.6Hz, Ar-H), 7.20-7.17 (m, 3H, Ar-H), 7.07-7.02 (t, 1H, 3J8.32Hz, Ar-H), 7.00-6.98 (d, 2H, 3J8.88Hz, Ar-H), 4.15-4.12 (t, 2H, 3J6.6Hz, Ar-O-CH2-), 4.07-4.02 (t, 2H, 3J6.52Hz, Ar-O-CH2-), 1.91-1.79 (m, 4H, 2  Ar-O-CH2-CH2-), 1.50-1.27 (m, 30H, 15  -CH2-), 0.90-0.87 (m, 6H, 2  -CH3).

**1-(3-Fluoro-4-*n*-decyloxybenzoyloxy-4-benzoyloxy)phenylene-3-(4-*n*-dodecyloxy-**

**benzoyloxy-4-benzoate), 15**

Yield, 68%; m.p. 105.5C; max: 3080, 2920, 2853, 1736, 1730, 1605, 1281, 1163, 1061 cm-1; H: 8.30-8.27 (m, 4H, Ar-H), 8.16-8.14 (d, 2H, 3J8.84Hz, Ar-H), 7.98-7.96 (d, 1H, 3J8.72Hz, Ar-H), 7.93-7.89 (dd, 1H, 3J11.44Hz, 4J1.92Hz, Ar-H), 7.52-7.48 (t, 1H, 3J8.28Hz, Ar-H), 7.39-7.36 (d, 4H, 3J7.8Hz, Ar-H), 7.20-7.17 (m, 3H, Ar-H), 7.07-7.02 (t, 1H, 3J8.28Hz, Ar-H), 7.00-6.98 (d, 2H, 3J8.84Hz, Ar-H), 4.15-4.12 (t, 2H, 3J6.56Hz, Ar-O-CH2-), 4.07-4.02 (t, 2H, 3J6.52Hz, Ar-O-CH2-), 1.91-1.79 (m, 4H, 2  Ar-O-CH2-CH2-), 1.53-1.27 (m, 32H, 16  -CH2-), 0.90-0.87 (m, 6H, 2  -CH3).

**1-(3-Fluoro-4-*n*-undecyloxybenzoyloxy-4-benzoyloxy)phenylene-3-(4-*n*-dodecyloxy-**

**benzoyloxy-4-benzoate), 16**

Yield, 71%; m.p. 108.0C; max: 3080, 2920, 2853, 1736, 1730, 1605, 1281, 1160, 1074 cm-1; H: 8.30-8.27 (m, 4H, Ar-H), 8.16-8.14 (d, 2H, 3J8.88Hz, Ar-H), 7.98-7.96 (d, 1H, 3J8.64Hz, Ar-H), 7.93-7.89 (dd, 1H, 3J11.4Hz, 4J2.0Hz, Ar-H), 7.52-7.48 (t, 1H, 3J8.4Hz, Ar-H), 7.39-7.36 (d, 4H, 3J8.68Hz, Ar-H), 7.20-7.17 (m, 3H, Ar-H), 7.07-7.02 (t, 1H, 3J8.28Hz, Ar-H), 7.00-6.98 (d, 2H, 3J8.88Hz, Ar-H), 4.15-4.12 (t, 2H, 3J6.56Hz, Ar-O-CH2-), 4.07-4.02 (t, 2H, 3J6.52Hz, Ar-O-CH2-), 1.91-1.79 (m, 4H, 2  Ar-O-CH2-CH2-), 1.51-1.27 (m, 34H, 17  -CH2-), 0.90-0.87 (m, 6H, 2  -CH3).

**1-(3-Fluoro-4-*n*-dodecyloxybenzoyloxy-4-benzoyloxy)phenylene-3-(4-*n*-dodecyloxy-**

**benzoyloxy-4-benzoate), 17**

Yield, 68%; m.p. 110.0C; max: 3082, 2916, 2851, 1736, 1605, 1281, 1160, 1074 cm-1; H: 8.30-8.27 (m, 4H, Ar-H), 8.16-8.14 (d, 2H, 3J8.84Hz, Ar-H), 7.98-7.96 (d, 1H, 3J8.76Hz, Ar-H), 7.93-7.89 (dd, 1H, 3J11.44Hz, 4J1.92Hz, Ar-H), 7.52-7.48 (t, 1H, 3J8.28Hz, Ar-H), 7.39-7.36 (d, 4H, 3J8.48Hz, Ar-H), 7.20-7.17 (m, 3H, Ar-H), 7.07-7.02 (t, 1H, 3J8.44Hz, Ar-H), 7.00-6.98 (d, 2H, 3J8.84Hz, Ar-H), 4.15-4.12 (t, 2H, 3J6.56Hz, Ar-O-CH2-), 4.07-4.02 (t, 2H, 3J6.52Hz, Ar-O-CH2-), 1.91-1.79 (m, 4H, 2  Ar-O-CH2-CH2-), 1.50-1.27 (m, 36H, 18  -CH2-), 0.90-0.87 (m, 6H, 2  -CH3).

**1-(3-Fluoro-4-*n*-tetradecyloxybenzoyloxy-4-benzoyloxy)phenylene-3-(4-*n*-dodecyl-**

**oxybenzoyloxy-4-benzoate), 18**

Yield, 71%; m.p. 106.0C; max: 3072, 2918, 2851, 1736, 1605, 1281, 1160, 1074 cm-1; H: 8.30-8.27 (m, 4H, Ar-H), 8.16-8.14 (d, 2H, 3J8.84Hz, Ar-H), 7.98-7.96 (d, 1H, 3J8.88Hz, Ar-H), 7.93-7.89 (dd, 1H, 3J11.4Hz, 4J1.96Hz, Ar-H), 7.52-7.48 (t, 1H, 3J8.28Hz, Ar-H), 7.39-7.36 (d, 4H, 3J7.64Hz, Ar-H), 7.20-7.17 (m, 3H, Ar-H), 7.07-7.02 (t, 1H, 3J8.28Hz, Ar-H), 7.00-6.98 (d, 2H, 3J8.84Hz, Ar-H), 4.15-4.12 (t, 2H, 3J6.56Hz, Ar-O-CH2-), 4.07-4.02 (t, 2H, 3J6.52Hz, Ar-O-CH2-), 1.91-1.79 (m, 4H, 2  Ar-O-CH2-CH2-), 1.53-1.27 (m, 40H, 20  -CH2-), 0.90-0.87 (m, 6H, 2  -CH3).

**1-(3-Fluoro-4-*n*-hexadecyloxybenzoyloxy-4-benzoyloxy)phenylene-3-(4-*n*-dodecyl-**

**oxybenzoyloxy-4-benzoate), 19**

Yield, 73%; m.p. 100.0C; max: 3082, 2918, 2851, 1736, 1605, 1281, 1160, 1074 cm-1; H: 8.30-8.27 (m, 4H, Ar-H), 8.16-8.14 (d, 2H, 3J8.88Hz, Ar-H), 7.98-7.96 (d, 1H, 3J8.84Hz, Ar-H), 7.93-7.89 (dd, 1H, 3J11.4Hz, 4J1.96Hz, Ar-H), 7.52-7.48 (t, 1H, 3J8.36Hz, Ar-H), 7.39-7.36 (d, 4H, 3J8.6Hz, Ar-H), 7.20-7.17 (m, 3H, Ar-H), 7.07-7.02 (t, 1H, 3J8.32Hz, Ar-H), 7.00-6.98 (d, 2H, 3J8.88Hz, Ar-H), 4.15-4.12 (t, 2H, 3J6.56Hz, Ar-O-CH2-), 4.07-4.02 (t, 2H, 3J6.52Hz, Ar-O-CH2-), 1.91-1.79 (m, 4H, 2  Ar-O-CH2-CH2-), 1.50-1.26 (m, 44H, 22  -CH2-), 0.90-0.87 (m, 6H, 2  -CH3).

**1-(3-Fluoro-4-*n*-octadecyloxybenzoyloxy-4-benzoyloxy)phenylene-3-(4-*n*-dodecyl-oxybenzoyloxy-4-benzoate), 20**

Yield, 74%; m.p. 99.0C; max: 3082, 2916, 2851, 1736, 1605, 1281, 1160, 1068 cm-1; H: 8.30-8.27 (m, 4H, Ar-H), 8.16-8.14 (d, 2H, 3J8.88Hz, Ar-H), 7.98-7.96 (d, 1H, 3J8.64Hz, Ar-H), 7.93-7.89 (dd, 1H, 3J11.36Hz, 4J2.04Hz, Ar-H), 7.52-7.48 (t, 1H, 3J8.4Hz, Ar-H), 7.39-7.36 (d, 4H, 3J8.68Hz, Ar-H), 7.20-7.17 (m, 3H, Ar-H), 7.07-7.02 (t, 1H, 3J8.32Hz, Ar-H), 7.00-6.98 (d, 2H, 3J8.88Hz, Ar-H), 4.15-4.12 (t, 2H, 3J6.6Hz, Ar-O-CH2-), 4.07-4.02 (t, 2H, 3J6.56Hz, Ar-O-CH2-), 1.91-1.79 (m, 4H, 2  Ar-O-CH2-CH2-), 1.50-1.26 (m, 48H, 24  -CH2-), 0.89-0.86 (m, 6H, 2  -CH3).
